# Supplementary material
Source: Springer Nature journal article supplement (https://www.springermedizin.de/resource/supplementary/12891_2014_2269_MOESM1_ESM.pdf/9509830)
Supplement: MOESM1 [file 9509830]

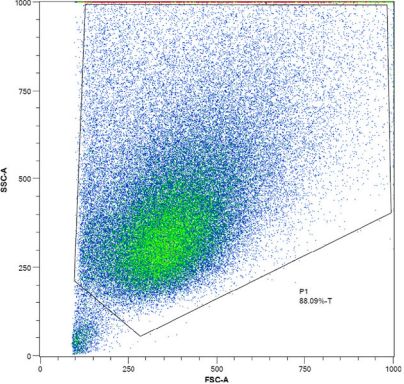

FSC/SSC

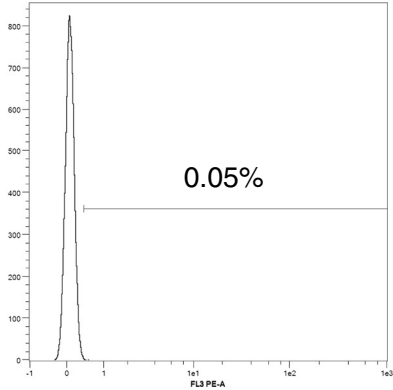

Isotype AB

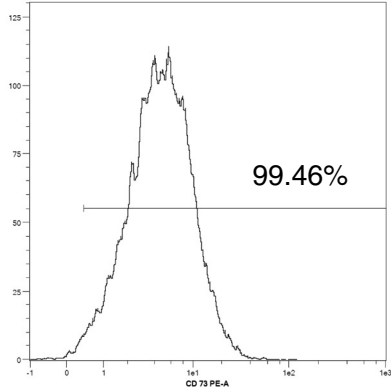

CD73+ MSCs
